# Supplementary material for: Impact of bias adjustment strategy on ensemble projections of hydrological extremes
Source: Copernicus journal article supplement (doi:10.5194/egusphere-2024-3966), 2025-03-03
Supplement: Supplementary file 1 [file egusphere-2024-3966-supplement.pdf]

# Supplement of "Impact of bias adjustment strategy on ensemble projections of hydrological extremes"

Paul C. Astagneau<sup>1,2,3</sup>, Raul R. Wood<sup>1,2,3</sup>, Mathieu Vrac<sup>4</sup>, Sven Kotlarski<sup>5</sup>, Pradeebane Vaithinada Ayar<sup>4</sup>, Bastien François<sup>6</sup>, and Manuela I. Brunner<sup>1,2,3</sup>

<sup>1</sup>WSL Institute for Snow and Avalanche Research SLF, Davos Dorf, Switzerland

<sup>2</sup>Institute for Atmospheric and Climate Science, ETH Zurich, Zurich, Switzerland

<sup>3</sup>Climate Change, Extremes and Natural Hazards in Alpine Regions Research Center CERC, Davos Dorf, Switzerland

<sup>4</sup>Laboratoire des Sciences du Climat et de l'Environnement (LSCE-IPSL), CEA/CNRS/UVSQ, Université Paris-Saclay, Centre d'Etudes de Saclay, Orme des Merisiers, 91191 Gif-sur-Yvette, France

<sup>5</sup>Federal Office of Meteorology and Climatology MeteoSwiss, Zurich-Airport, Switzerland

<sup>6</sup>Royal Netherlands Meteorological Institute (KNMI), Research and Development Weather and Climate (RDWK), De Bilt, The Netherlands

**Correspondence:** Paul C. Astagneau (paul.astagneau@slf.ch)

## S1 Dataset

Table S1: List of the 87 catchments used in the study.

| River name  | Station                     |
|-------------|-----------------------------|
| Birse       | Soyhières, Bois du Treuil   |
| Albula      | Tiefencastel                |
| Thur        | Jonschwil, Mühlaus          |
| Kander      | Hondrich                    |
| Kleine Emme | Emmen                       |
| Emme        | Emmenmatt                   |
| Glatt       | Rheinsfelden                |
| Broye       | Payerne, Caserne d'aviation |
| Areuse      | Boudry                      |
| Wigger      | Zofingen                    |
| Sense       | Thörishaus, Sensematt       |
| Simme       | Oberwil                     |
| Töss        | Neftenbach                  |
| Kleine Emme | Werthenstein, Chappelboden  |
| Plessur     | Chur                        |

| River name                  | Station                  |
|-----------------------------|--------------------------|
| Lorze                       | Frauenthal               |
| Ergolz                      | Liestal                  |
| Sitter                      | St. Gallen, Bruggen / Au |
| Dünnern                     | Olten, Hammermühle       |
| Venoge                      | Ecublens, Les Bois       |
| Murg                        | Frauenfeld               |
| Allaine                     | Boncourt, Frontière      |
| Reuss                       | Andermatt                |
| Ilfis                       | Langnau                  |
| Birse                       | Moutier, La Charrue      |
| Verzasca                    | Lavertezzo, Campiöi      |
| Landwasser                  | Davos, Frauenkirch       |
| Murg                        | Murgenthal, Walliswil    |
| Werdenberger Binnenkanal    | Salez                    |
| Rheintaler Binnenkanal      | St. Margrethen           |
| Inn                         | St. Moritzbad            |
| Grande Eau                  | Aigle                    |
| Rom                         | Müstair                  |
| Suze                        | Sonceboz                 |
| Emme                        | Eggiwil, Heidbüel        |
| Calancasca                  | Buseno                   |
| Promenthouse                | Gland, Route Suisse      |
| Gürbe                       | Belp, Mülimatt           |
| Liechtensteiner Binnenkanal | Ruggell                  |
| Seyon                       | Valangin                 |
| Schächen                    | Bürglen, Galgenwäldli    |
| Seez                        | Mels                     |
| Aubonne                     | Allaman, Le Coulet       |
| Mentue                      | Yvonand, La Mauguettaz   |
| Luthern                     | Nebikon                  |
| Areuse                      | St-Sulpice               |
| Lorze                       | Zug, Letzi               |
| Necker                      | Mogelsberg, Aachsäge     |
| Murg                        | Wängi                    |

| River name         | Station                      |
|--------------------|------------------------------|
| Saltina            | Brig                         |
| Cassarate          | Pregassona                   |
| Suhre              | Oberkirch                    |
| Sitter             | Appenzell                    |
| Chamuerabach       | La Punt-Chamues-ch           |
| Aabach             | Hitzkirch, Richensee         |
| Scheulte           | Vicques                      |
| Worble             | Ittigen                      |
| Veveyse            | Vevey, Copet                 |
| Langeten           | Huttwil, Häberenbad          |
| Minster            | Euthal, Rüti                 |
| Ova dal Fuorn      | Zernez, Punt la Drossa       |
| Goldach            | Goldach, Bleiche             |
| Aach               | Salmsach, Hungerbühl         |
| Breggia            | Chiasso, Ponte di Polenta    |
| Alp                | Einsiedeln                   |
| Orbe               | Le Chenit, Frontière         |
| Riale di Pincascia | Lavertezzo                   |
| Grosstalbach       | Isenthal                     |
| Sionge             | Vuippens, Château            |
| Dischmabach        | Davos, Kriegsmatte           |
| Goneri             | Oberwald                     |
| Magliasina         | Magliaso, Ponte              |
| Biber              | Biberbrugg                   |
| Allenbach          | Adelboden                    |
| Ova da Cluozza     | Zernez                       |
| Rein da Sumvitg    | Somvitg, Encardens           |
| Chli Schliere      | Alpnach, Chilch-Erli         |
| Krummbach          | Klusmatten                   |
| Glatt              | Herisau, Zellersmühle        |
| Poschiavino        | La Rösa                      |
| Sellenbodenbach    | Neuenkirch                   |
| Grossbach          | Einsiedeln, Gross            |
| Riale di Roggiasca | Roveredo, Bacino di compenso |

| River name   | Station            |
|--------------|--------------------|
| Parimbot     | Ecublens, Eschiens |
| Rietholzbach | Mosnang, Rietholz  |
| Sissle       | Eiken              |
| Reppisch     | Dietikon           |

## S2 Snow water equivalent simulations

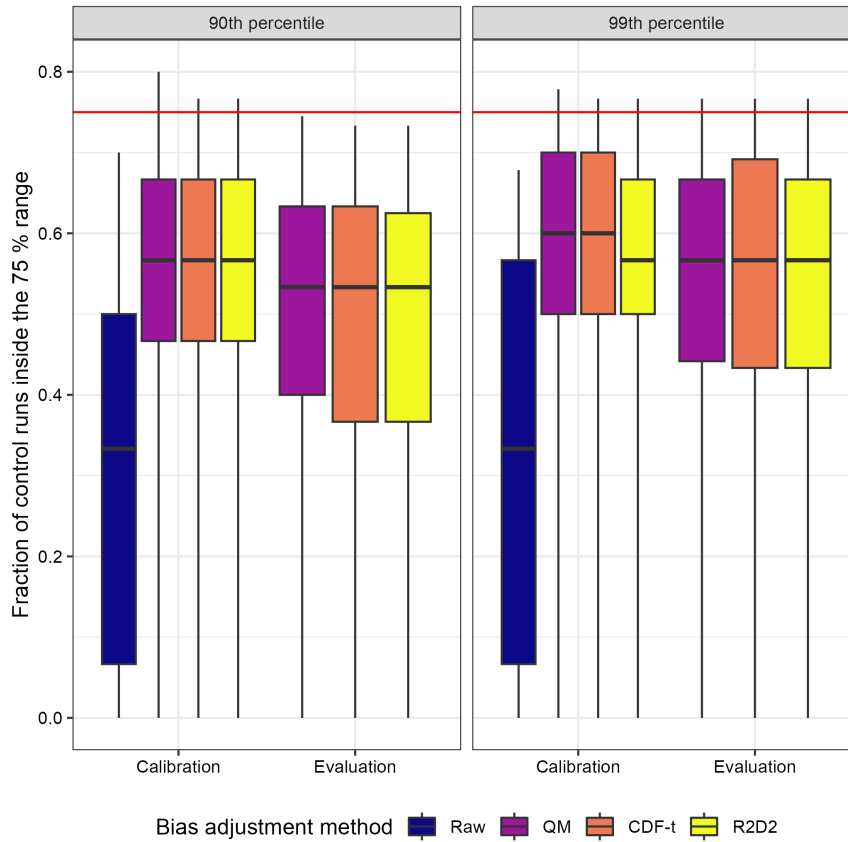

**Figure S1.** Efficiency of three bias adjustment methods and the unadjusted ensemble (raw) in reproducing snow water equivalent (control run) statistics for the 87 catchments. The fraction of control runs within the 75 % range was calculated for two percentiles (90<sup>th</sup> and 99<sup>th</sup>). The optimum value of the performance criterion is 0.75. QM is the univariate non-change-preserving method. CDF-t is the univariate change-preserving method. R2D2 is the multivariate change-preserving method. All methods were run using the ensemble adjustment approach. Calibration and evaluation combine both climatic sub-periods.

### S3 Streamflow simulations with another hydrological model

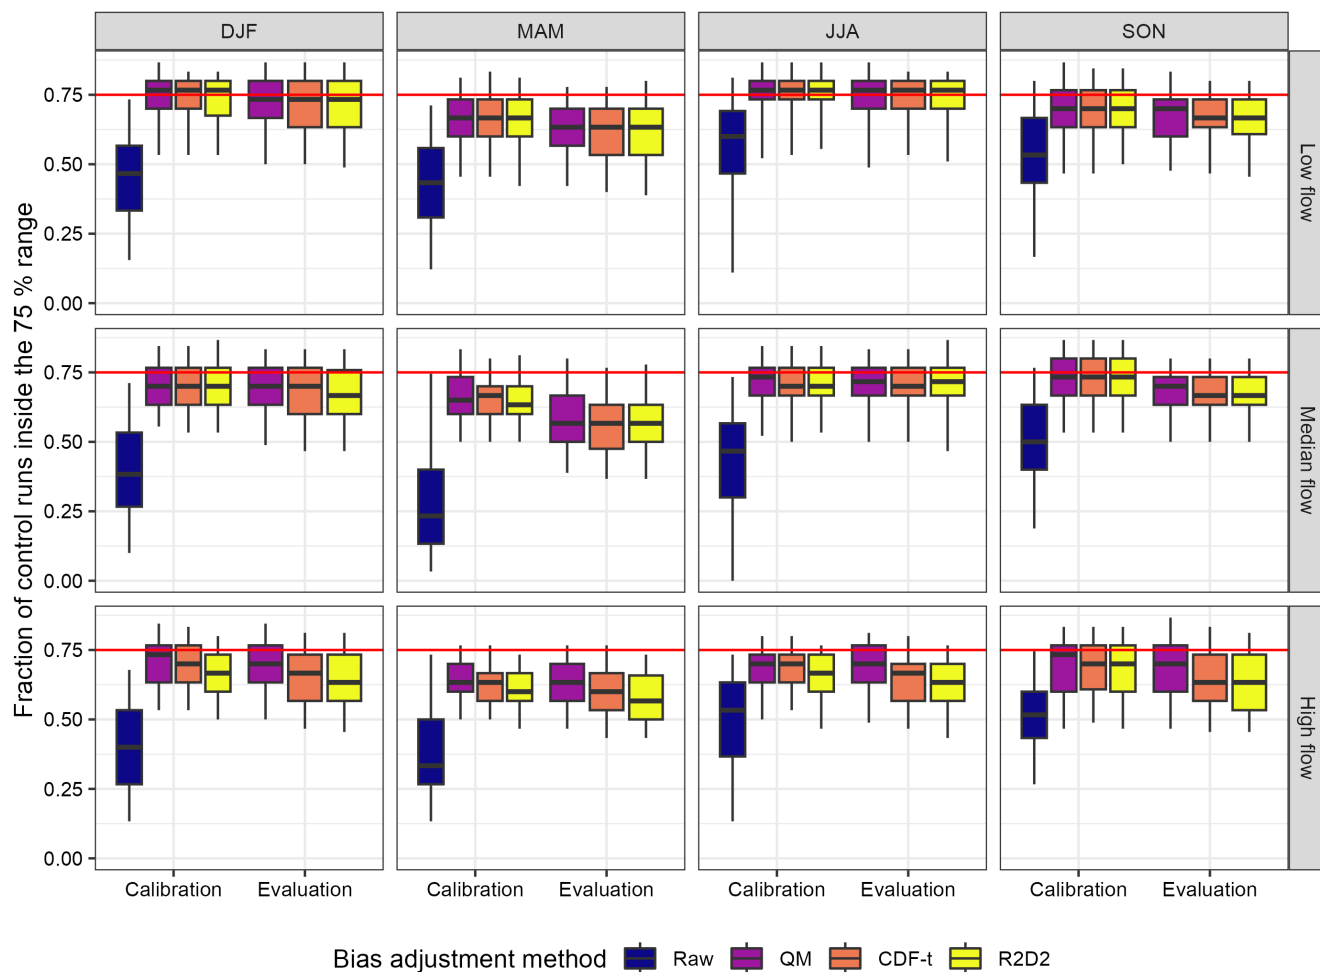

**Figure S2.** Efficiency of three bias adjustment methods and the unadjusted ensemble (raw) in reproducing streamflow statistics of the control runs for the 87 catchments. Streamflow was simulated with the Cemaneige-GR5J model (Le Moine, 2008; Valéry et al., 2014; Coron et al., 2020). The fraction of control runs within the 75 % range was calculated for four seasons (December/January/February, March/April/May, June/July/August, September/October/November) and three streamflow percentiles (1<sup>st</sup>, 50<sup>th</sup> and 99<sup>th</sup>). The optimum value of the performance criterion is 0.75. QM is the univariate non-change-preserving method. CDF-t is the univariate change-preserving method. R2D2 is the multivariate change-preserving method. All methods were run using the ensemble adjustment approach. Calibration and evaluation combine both climatic sub-periods.

S4 Relationship between temperature performance and the raw signal between sub-periods

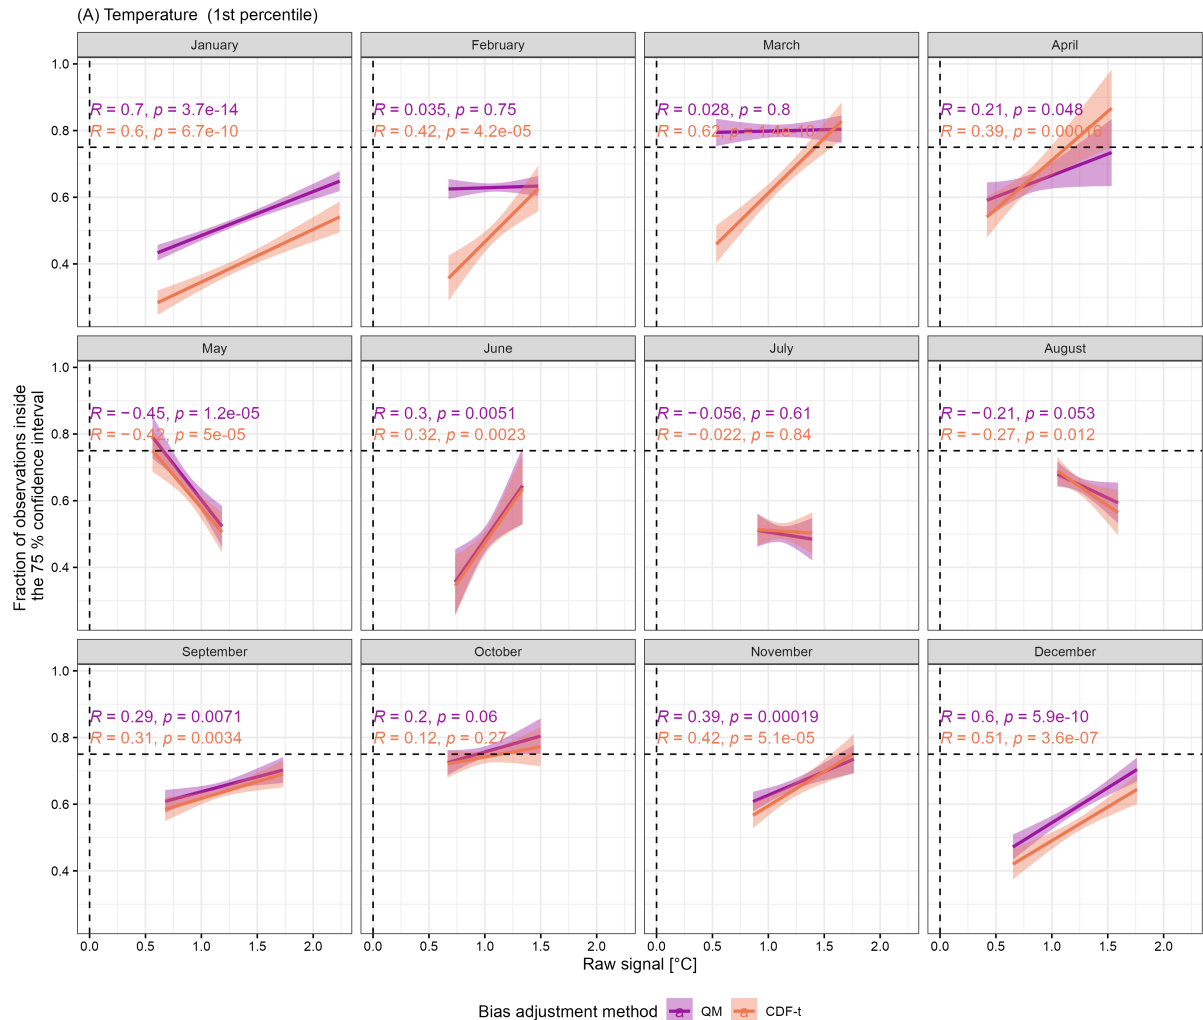

**Figure S3.** Relationship between temperature (1<sup>st</sup> percentile) performance (evaluation sub-period P1) and the raw signal between sub-periods, for 87 catchments.. Performance is assessed with the fraction of observations falling inside the simulated 75 % confidence interval. The signal is the difference (absolute) between the percentile value of the sub-period P2 and the percentile value of the sub-period P1. The results are shown with a linear regression (line) with the 95% confidence interval (bandwidth). QM is the non change-preserving bias adjustment method and CDF-t is the change-preserving bias adjustment method. The results are shown for the ensemble adjustment option.

5 S5 Relationship between precipitation performance and the raw signal between sub-periods

S6 Relationship between temperature performance and the raw and observed signals between sub-periods

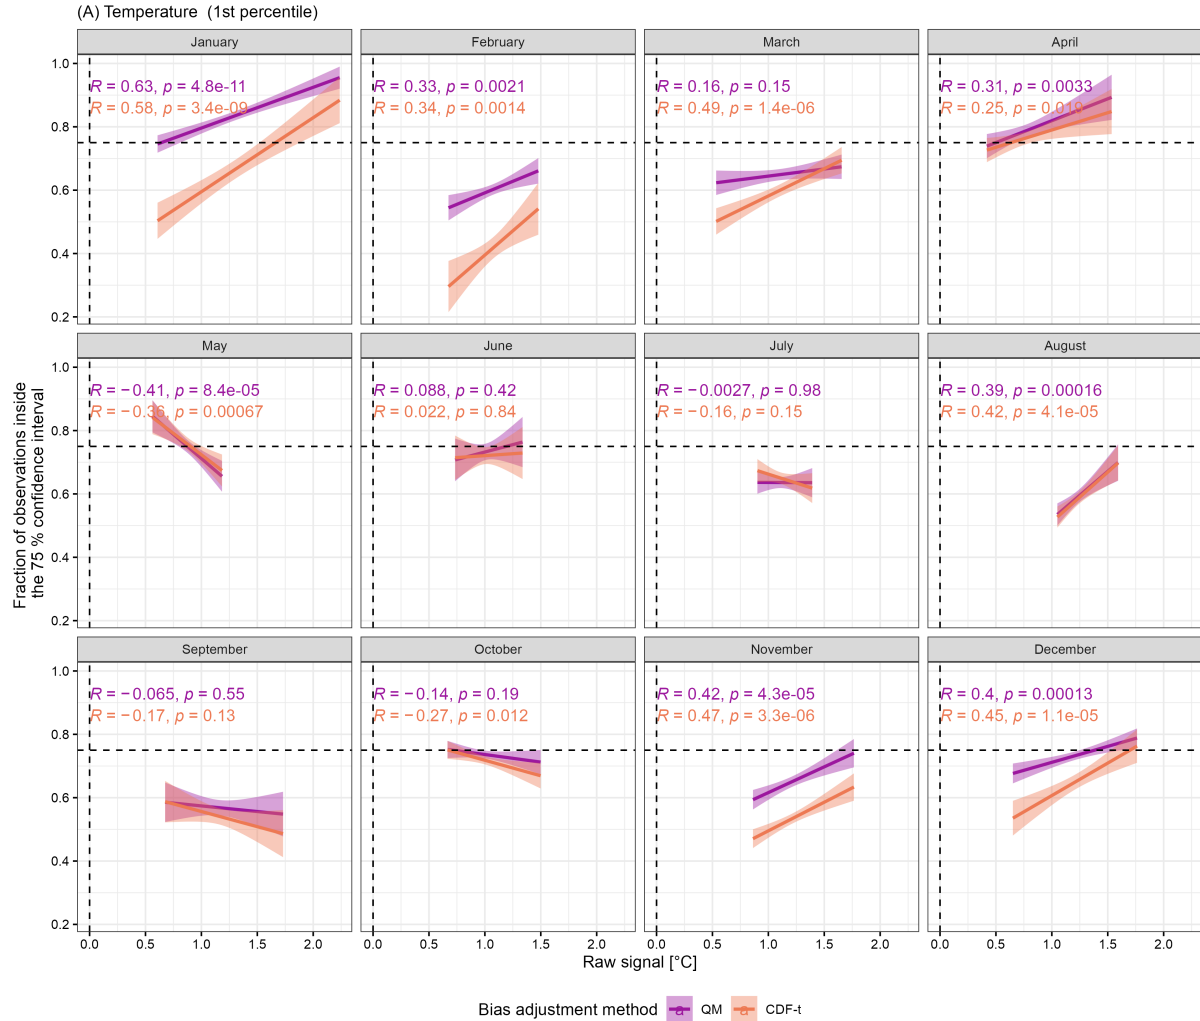

**Figure S4.** Relationship between temperature (1<sup>st</sup> percentile) performance (evaluation sub-period P2) and the raw signal between sub-periods, for 87 catchments.. Performance is assessed with the fraction of observations falling inside the simulated 75 % confidence interval. The signal is the difference (absolute) between the percentile value of the sub-period P2 and the percentile value of the sub-period P1. The results are shown with a linear regression (line) with the 95% confidence interval (bandwidth). QM is the non change-preserving bias adjustment method and CDF-t is the change-preserving bias adjustment method. The results are shown for the ensemble adjustment option.

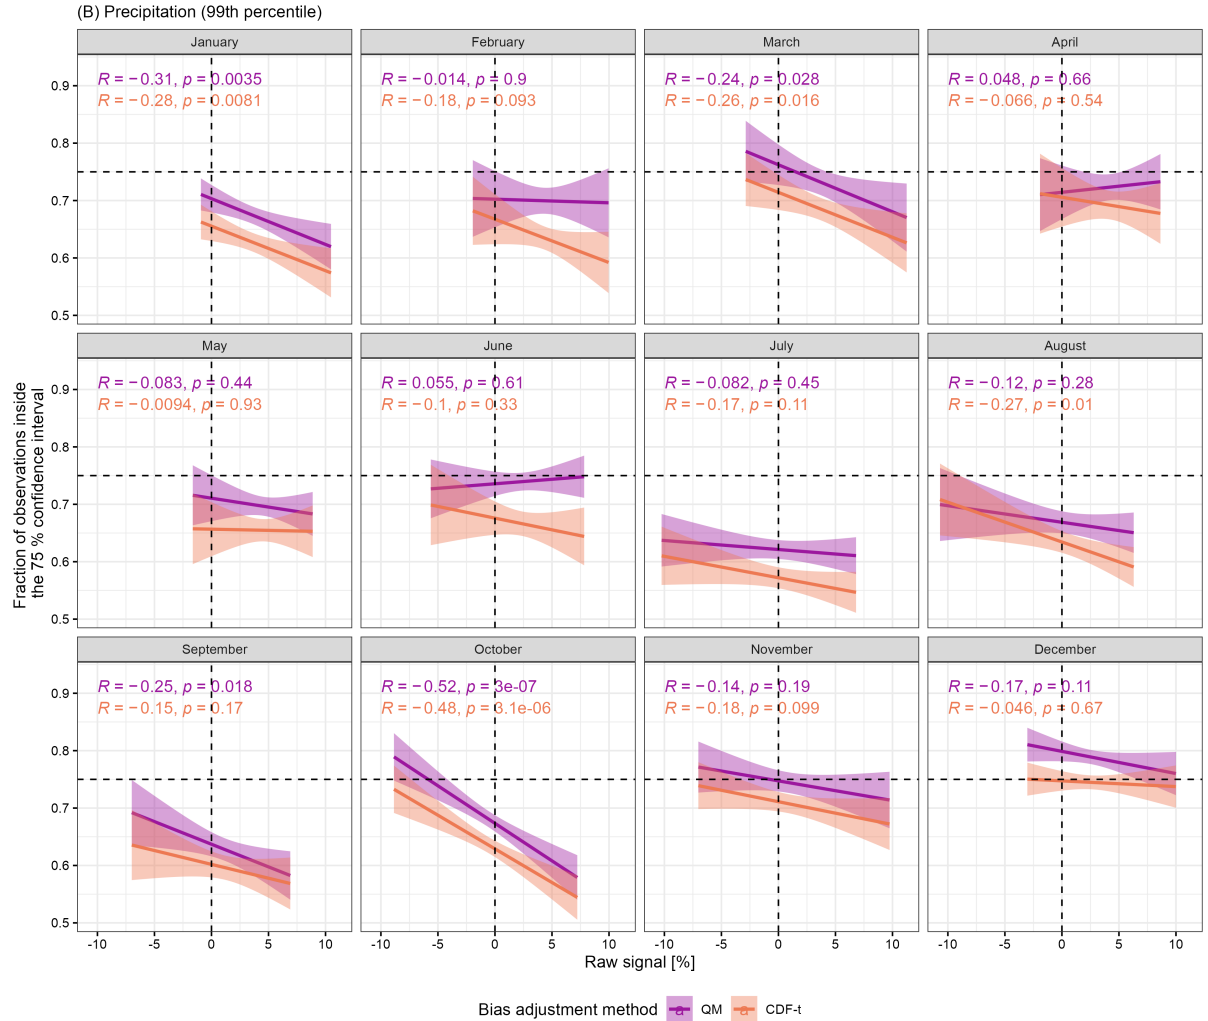

**Figure S5.** Relationship between precipitation (99<sup>th</sup> percentile) performance (evaluation sub-period P1) and the raw signal between sub-periods, for 87 catchments.. Performance is assessed with the fraction of observations falling inside the simulated 75 % confidence interval. The signal is the difference (relative) between the percentile value of the sub-period P2 and the percentile value of the sub-period P1. The results are shown with a linear regression (line) with the 95% confidence interval (bandwidth). QM is the non change-preserving bias adjustment method and CDF-t is the change-preserving bias adjustment method. The results are shown for the ensemble adjustment option.



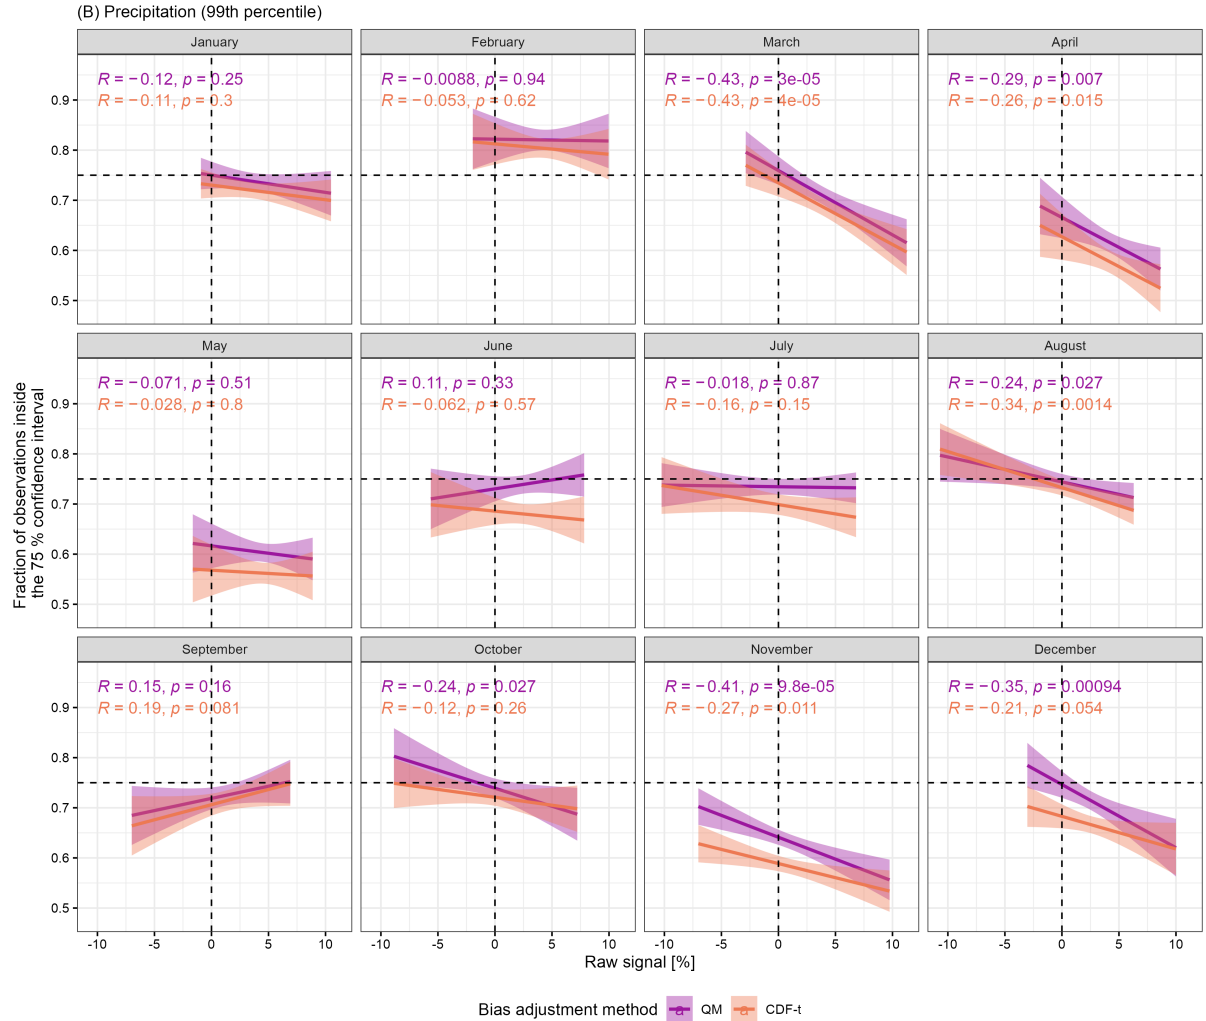

**Figure S6.** Relationship between precipitation (99<sup>th</sup> percentile) performance (evaluation sub-period P2) and the raw signal between sub-periods, for 87 catchments. Performance is assessed with the fraction of observations falling inside the simulated 75 % confidence interval. The signal is the difference (relative) between the percentile value of the sub-period P2 and the percentile value of the sub-period P1. The results are shown with a linear regression (line) with the 95% confidence interval (bandwidth). QM is the non change-preserving bias adjustment method and CDF-t is the change-preserving bias adjustment method. The results are shown for the ensemble adjustment option.

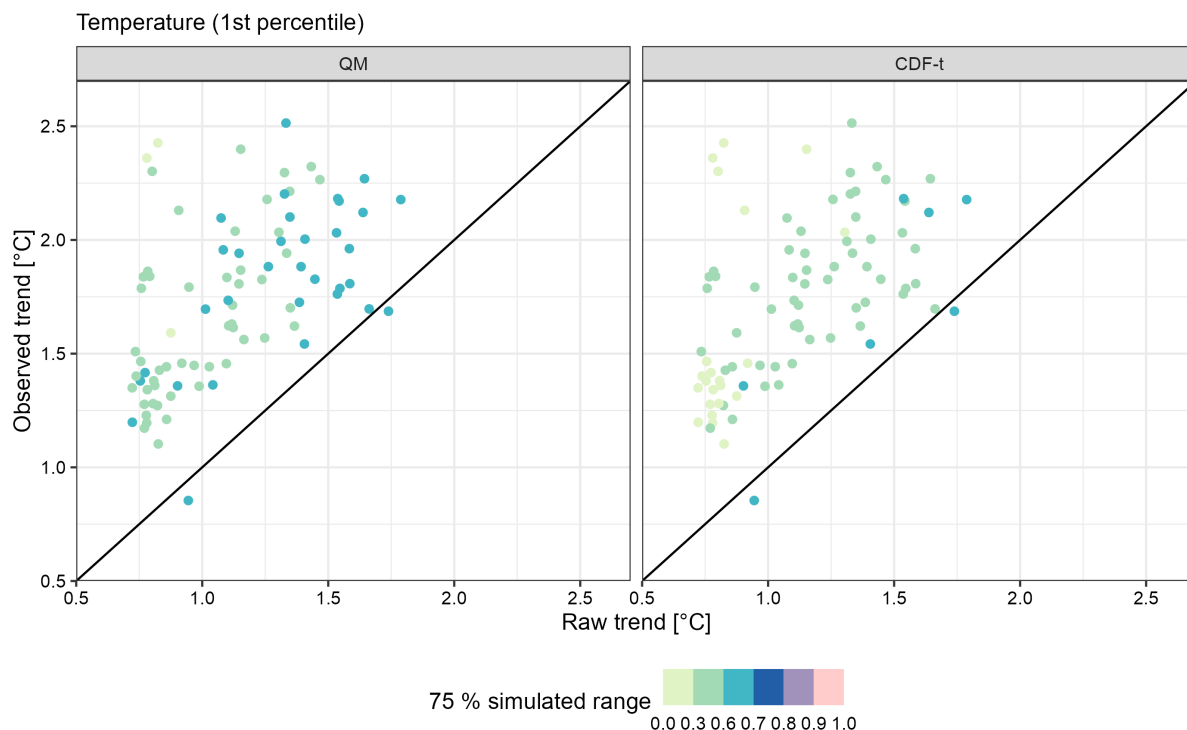

**Figure S7.** Comparison between observed and raw temperature signals (1<sup>st</sup> percentile) with regards to performance (evaluation sub-period P1) for 87 catchments. Performance is assessed with the fraction of observations falling inside the simulated 75 % confidence interval. The signal is the difference (absolute) between the percentile value of the sub-period P2 and the percentile value of the sub-period P1. QM is the non change-preserving bias adjustment method and CDF-t is the change-preserving bias adjustment method. The results are shown for the ensemble adjustment option.

## References

- Coron, L., Delaigue, O., Thirel, G., Dorchies, D., Perrin, C., and Michel, C.: airGR: Suite of GR Hydrological Models for Precipitation-Runoff Modelling. R package version 1.7.6., <https://doi.org/10.15454/EX11NA>, 2020.
- 10 Le Moine, N.: Le bassin versant de surface vu par le souterrain : une voie d'amélioration des performances et du réalisme des modèles pluie-débit ?, Ph.D. thesis, UPMC, Cemagref, <https://hal.inrae.fr/tel-02591478>, 2008.
- Valéry, A., Andréassian, V., and Perrin, C.: 'As simple as possible but not simpler': What is useful in a temperature-based snow-accounting routine? Part 2 – Sensitivity analysis of the Cemaneige snow accounting routine on 380 catchments, *Journal of Hydrology*, 517, 1176–1187, <https://doi.org/10.1016/j.jhydrol.2014.04.058>, 2014.
