# Supplementary material for: Impact of bias adjustment strategy on ensemble projections of hydrological extremes
Source: Copernicus journal article supplement (doi:10.5194/egusphere-2024-3966), 2025-03-03
Supplement: Supplementary file [file egusphere-2024-3966-CC1-supplement.pdf]

## Review of

# Impact of bias adjustment strategy on ensemble projections of hydrological extremes

Paul C. Astagneau, Raul R. Wood, Mathieu Vrac, Sven Kotlarski, Pradeebane Vaithinada Ayar, Bastien François, and Manuela I. Brunner

EGUSPHERE-2024-3966

## Summary

Astagneau et al. (2025) present a comprehensive hydrological climate impact study using single model initial-condition large ensembles (SMILEs) as input data. The focus is put on the bias-adjustment step in the modelling chain. They investigate how different choices of the bias-adjustment method and its application affect the outcome on hydrometeorological extremes. The choices are: Univariate vs. bivariate bias-adjustment, trend-preserving vs non-trend-preserving bias-adjustment, and grouping all ensemble members when calibrating the bias-adjustment parameters or calibrating the parameters for each member individually.

The results show that the choice of ensemble vs individual calibration, as well as trend-preserving vs non-trend-preserving method has larger impact than univariate vs. bivariate bias-adjustment and the authors recommend to use trend-preserving bias-adjustment methods in combination with ensemble calibration, and only use multivariate bias-adjustment if correlation structures are strongly biased in the raw climate model data.

## General comments

The paper is highly relevant in this field of research as it combines the rather novel SMILEs with still not fully assessed issues of bias-adjustment such as intervariable dependencies and modification of the climate change signal. It is very well written and nicely illustrated. The study is so comprehensive that the paper gets a bit overloaded. Here and there it becomes apparent that the authors had to leave out interesting information because otherwise, the article would have become even longer. In my opinion, the paper could have easily been split into two papers – for e.g. one about the meteorological analysis and one about the hydrological analysis. Both the hydrological part and the results of the bivariate bias-adjustment get too little space in the manuscript.

I have one general comment about the evaluation metric ‘Fraction of control runs inside the 75% range’. How did you choose the value of 75% range? Reading Suarez-Gutierrez et al. (2021) but also studies about evaluation of seasonal forecasts where ensemble forecasts have been around for a longer time (see for e.g. Crochemore et al., 2016), it looks like one recommends to look at the reliability of the projection as a whole, for e.g. by using the probability integral transform (PIT). I would argue that looking at the whole reliability rather than at one specific percentile interval gives a more complete analysis.

Overall, given the high scientific relevance and scientifically sound study and presentation, I recommend acceptance with minor revisions.

## Detailed comments

L198: P2 is half in the historical and half in the scenario part of the climate projections. I do not think that this constitutes a big issue, but I suggest to add a note about this in the text to make it clear that you are aware of the different characteristics of the two chosen periods.

L246: I do not fully agree with the statement here that the 75%-criterion evaluates bias and interannual variability of the ensemble. The over-/underconfidence of the ensemble forecast might just as well play a role in the 75%-criterion. The authors later on state that the interannual variability and the inter-member variability are equivalent. However, they also write that it does not hold this study, if I understood it correctly. Thus, it might be good to mention both the bias, the interannual variability and the inter-member variability as factors influencing the 75%-criterion.

L294ff and Figure 3: The maps of the 75%-criterion are hard to interpret. In the text, you often talk about how close the different stations are to the optimal value of 75% present. Since the difference to 0.75 is the focus, I suggest that you plot the difference of each station's result to the optimal value of 0.75 instead.

Text describing the results in Fig. 5: I can see that CDF-t in ensemble-mode has some difficulties in the evaluation period. You explain it later in Fig. 7 that this potentially could be linked to weak signals in the raw data between calibration and evaluation period. If that was the case, however, we should see the same issues with CDF-t in individual-mode. I would expect even worse performance in the individual-mode due to a more pronounced tendency for overfitting and hence, potentially larger drops in performance when evaluating on independent data. I would like the authors to check their argument.

Line 3: I think you have all data at hand to be more specific about this statement as you could exactly calculate both the bias and the reduction of the interannual ensemble spread. Based on your data, which of the two is contributing more to the results you see in Fig. 5?

Fig. 6: Why are the results in Fig. 6 not reflected in Fig. 5? In Fig. 6, it is apparent that for e.g. that individual-mode leads to strongly reduced ensemble spread for both the 90<sup>th</sup> and 99<sup>th</sup> percentile for precipitation (calibration period). In my understanding, this indicates an overconfident ensemble which should show too many observed data points to fall outside the ensemble spread. This is though not at all visible in Fig. 5 (B). There, ensemble and individual-mode perform equally in the calibration period. Could be please explain this apparent inconsistency? Note that I just took the case of precipitation as an example. There are other inconsistencies of the same kind between Fig. 6 and Fig. 5.

Text describing Fig. 7: It was difficult for me to follow the authors argumentation here and only understood the concept after having read the conclusions. I would like to ask the authors to spend 1 or two sentences even in the result section to explain the basic hypothesis a bit more. In any case, I think it is not fully convincing that a trend-preserving method cannot handle situations of week trends in the raw signal. In case of week trends, it should behave similarly than non-trend-preserving methods rather than introducing an artificial trend. This said, I speculate that the authors might have rather meant to look at deviating trends between the observational data and the climate model data between calibration and validation period. Due to natural variability it can happen that observational data show a positive (negative) trend while climate models show negative (positive) trends. If CDF-t enforces the trend in the climate model data but the observational data show a totally different trend, the performance in the evaluation period will drop. Note that this also applies to non-trend-

preserving methods. However, it could be that trend-preserving methods might be more susceptible to those kind of trend-inconsistencies between the datasets.

Fig. 8 (A): The results for QM, 1<sup>st</sup> percentile stick out. Do you have an idea why it is just at the lower tail where the large modification of the climate change signal happens? Have you for e.g. looked at other percentiles close to the 1<sup>st</sup> percentile or even the whole CDF to see where the modification kicks in? Do you know other studies where similar results were seen? It would be interesting to see if this might be a more general issue seen in other similar studies or if it is particular to this study.

Fig. 9: Why did you choose to show absolute values? I would prefer to see both negative and positive values to be able to better interpret Fig. 10. If I understood correctly, the SNR and time of emergence are interlinked. Thus, if QM increases (decreases) the SNR, the time of emergence should be earlier (later) than in raw projections. Is that a correct interpretation? If so, showing only absolute values in Fig. 9 makes it hard to understand/interpret why the time of emergence is earlier or later in Fig. 10.

L435: Please add a short explanation why you picked those 3 examples. They seem to be rather extreme in how the SNR is affected.

Lines 469-472: I do not understand why the seasonal adjustments used in this study improve the correlations between precipitation and temperature. Other studies also use varying adjustments throughout the year (e.g. often using months or a monthly moving window), yet they often see a clear improvement of the correlation between precipitation and temperature when using multivariate bias-adjustments and less so for univariate bias-adjustment. I would ask the authors to clarify this statement.

Line 516: replace “change-preserving methods” by “the change-preserving method used in this study”, because CDF-t is just one of the available change-preserving methods available and might not be fully representative for the whole group of change-preserving methods.

Lines 525-527: If I’m not mistaken, Vaithinada Ayar et al. (2021) investigated this with CDF-t as the only one bias-adjustment method. They state at the end that the results have to be reproduced by other methods. Please state clearer that results by Vaithinada Ayar et al. (2021) are valid for the combination of ensemble adjustment and CDF-t, and not general for all sorts of ensemble adjustment. In fact, your results seem to show that it does work better for QM.

Lines 530-533: Your statement sounds rather general while you actually have all data at hand. You could easily analyze the change in snowmelt and see if it corresponds with the results you see in figures 11 and 12. In fact, the differences appear to be more pronounced for median flows rather than high flow (Fig. 12). Maybe, snowmelt has an impact on the median flows? It is hard to tell based on the results given in the paper, as for e.g., one does not know when the low, median and high flows occur throughout the year.

Lines 558-562: There might be plenty of reasons why to prefer trend-preserving methods. However, the given one here might be very specific to this study. And without this reason, it boils down to the statement that trend-preserving methods are to be preferred since they are more in line with the target of climate impact studies to use change-preserving methods. I would ask the authors to sharpen their argumentation or to clearly state that the recommendation is based on two specific methods and a specific data set in the specific region – and other conclusions might be drawn in other studies.

**References:**

Crochemore, L., Ramos, M.-H., and Pappenberger, F.: Bias correcting precipitation forecasts to improve the skill of seasonal streamflow forecasts, *Hydrol. Earth Syst. Sci.*, 20, 3601–3618, <https://doi.org/10.5194/hess-20-3601-2016>, 2016.
